# Supplementary figures and images for: Working memory capacity of crows and monkeys arises from similar neuronal computations
Source: eLife journal article supplement (doi:10.7554/elife.72783), 2021-12-01

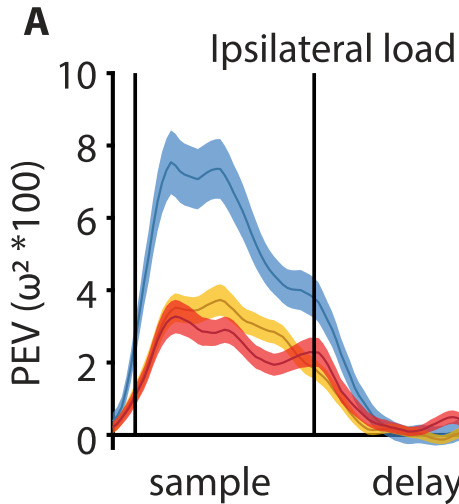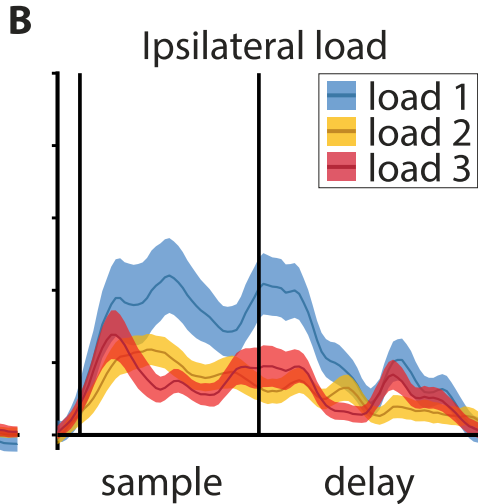

Supplement: supp [file elife-72783-supp-v1.zip]

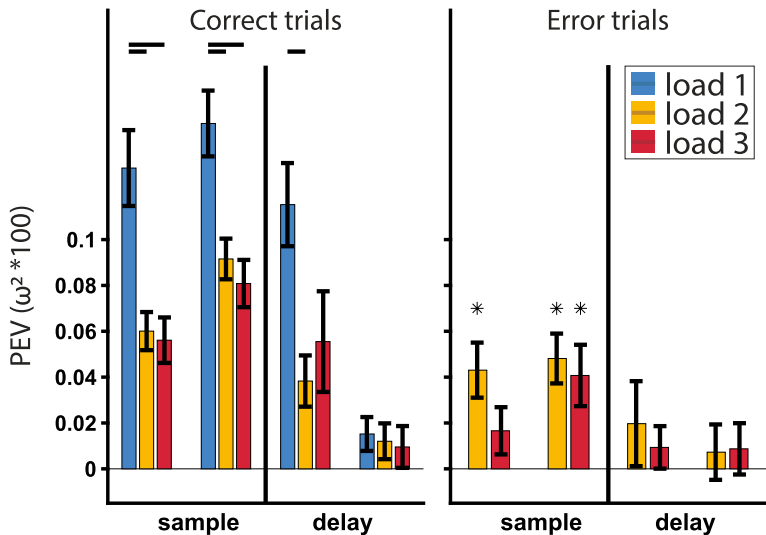

Supplement: supp [file elife-72783-supp-v1.zip]

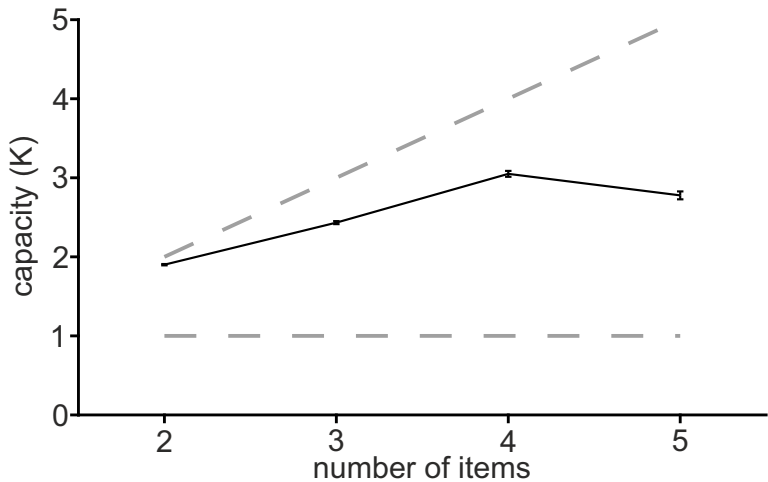

Supplement: supp [file elife-72783-supp-v1.zip]

No change of information with increasing load

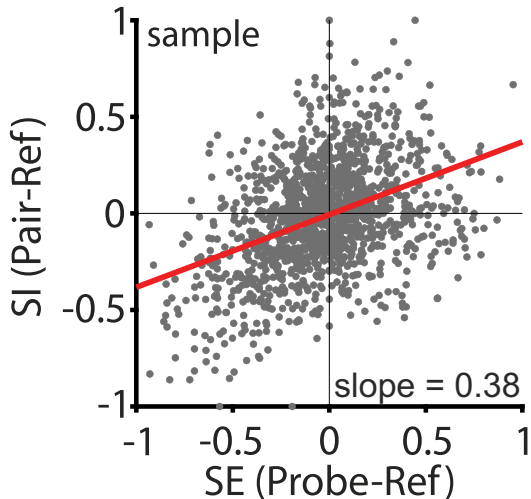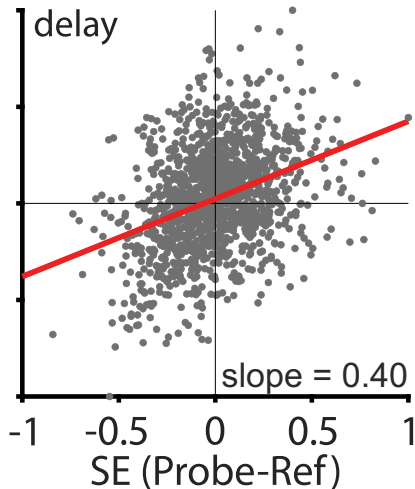

Supplement: supp [file elife-72783-supp-v1.zip]

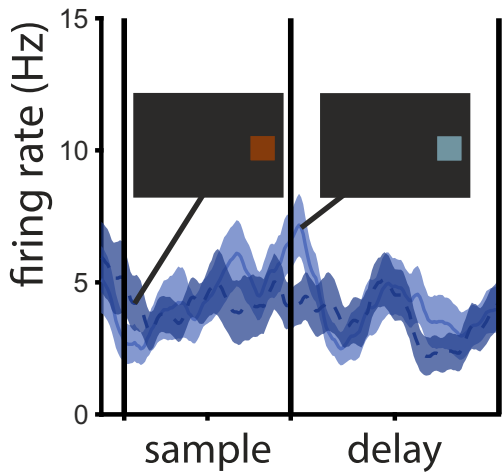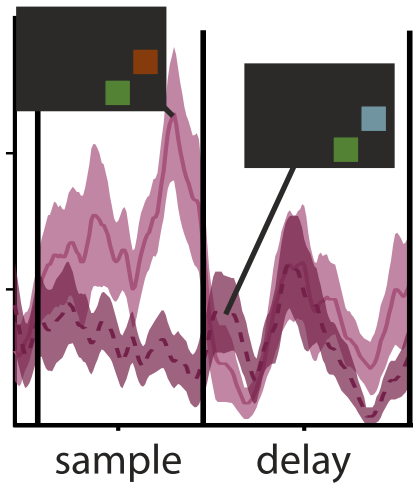

Supplement: supp [file elife-72783-supp-v1.zip]

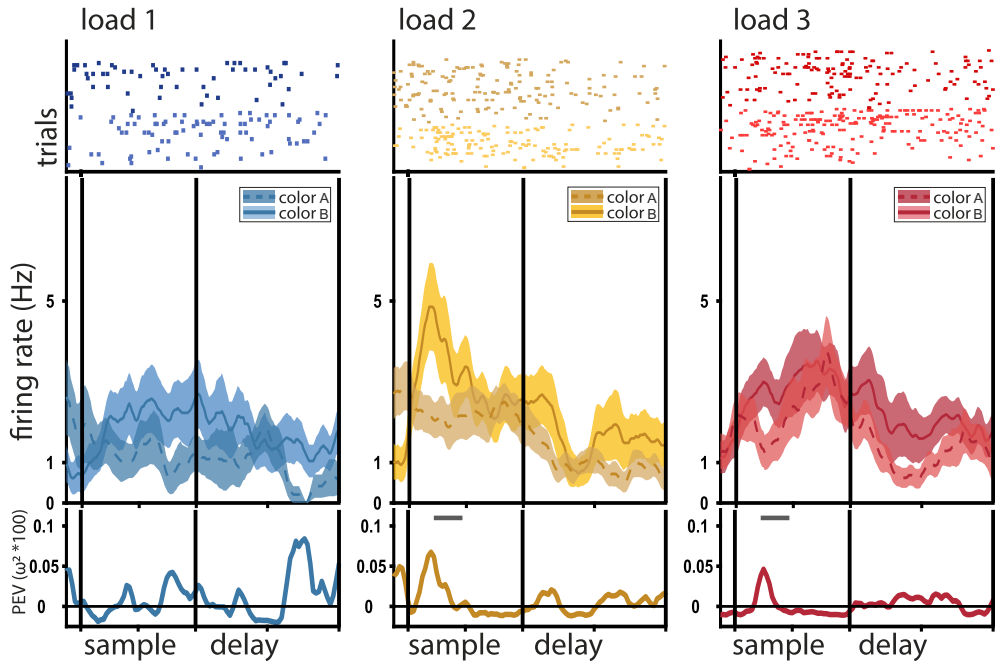

Supplement: supp [file elife-72783-supp-v1.zip]

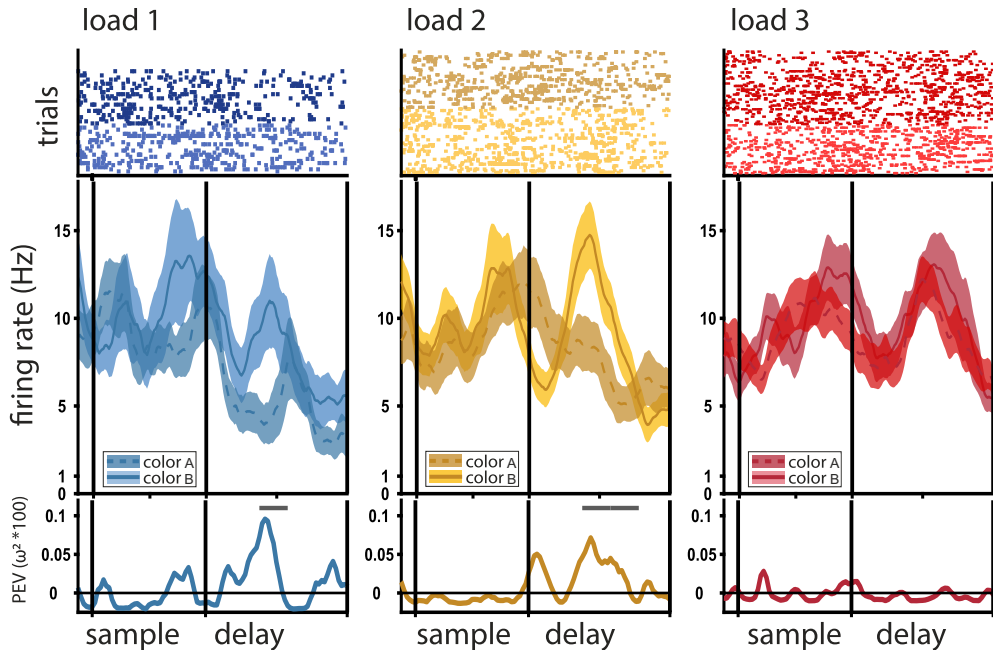

Supplement: supp [file elife-72783-supp-v1.zip]

**A**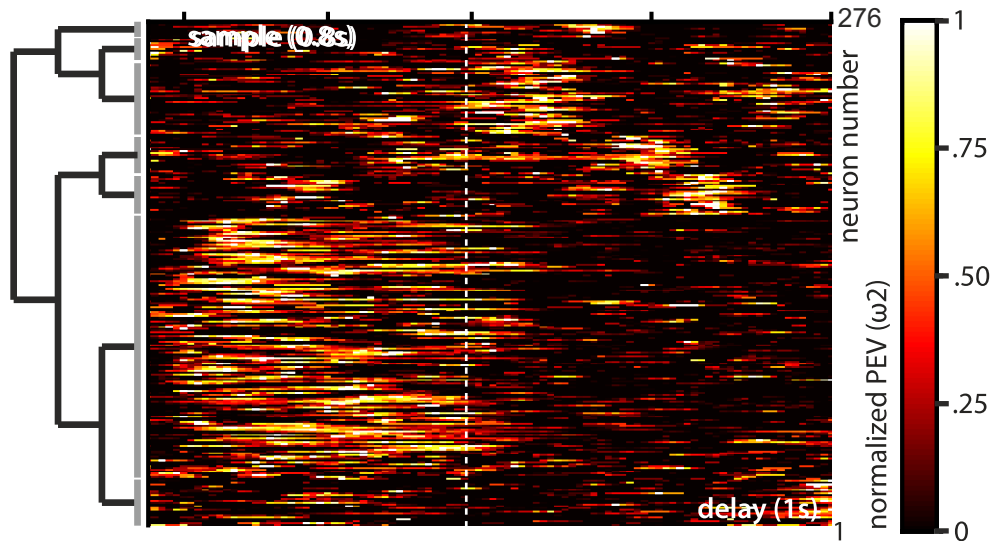**B**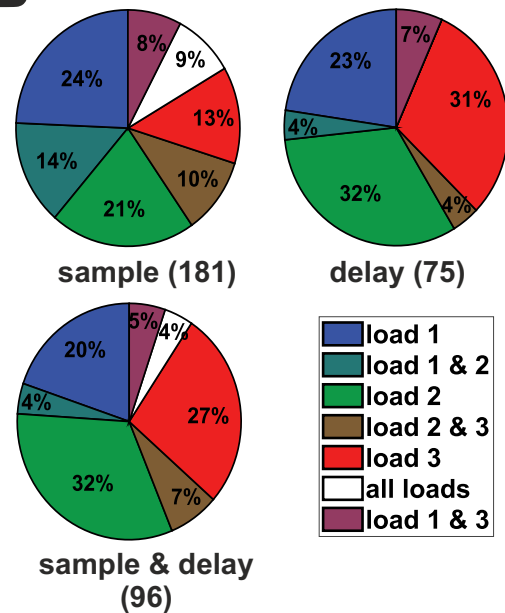**C**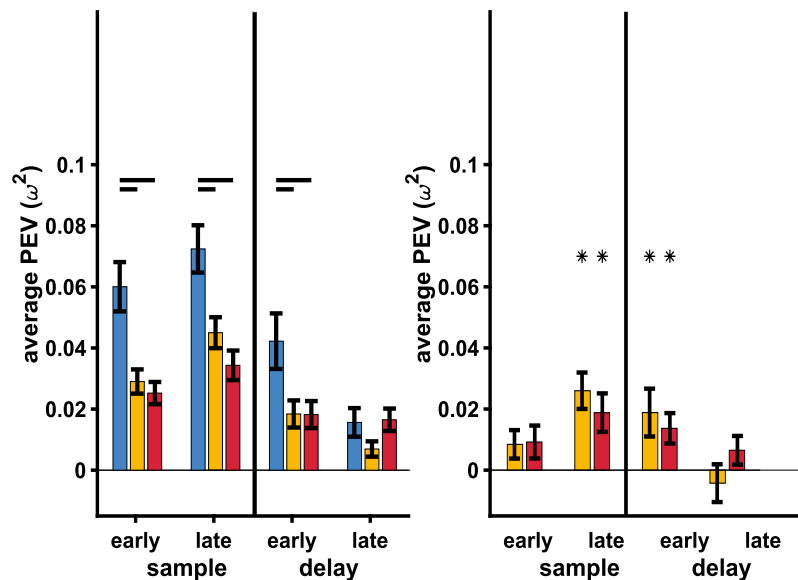**D**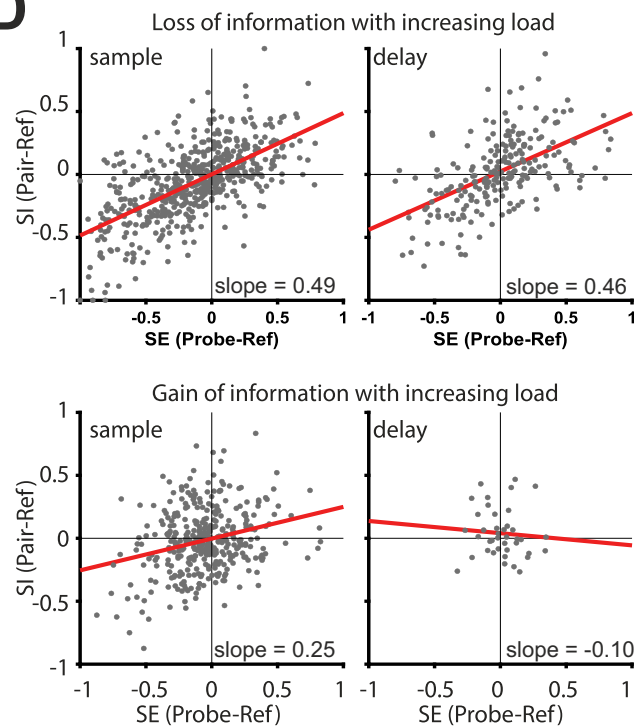

Supplement: supp [file elife-72783-supp-v1.zip]

**A**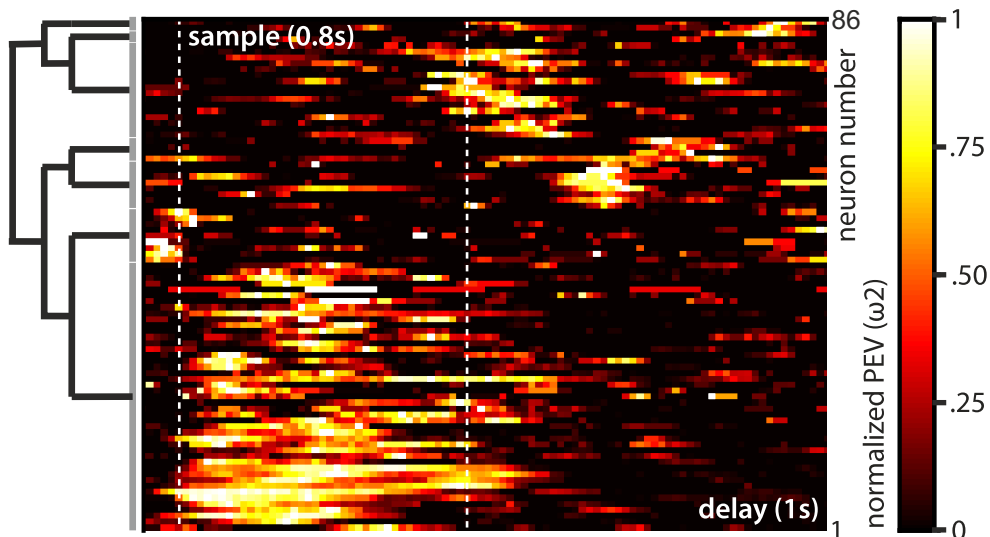**B**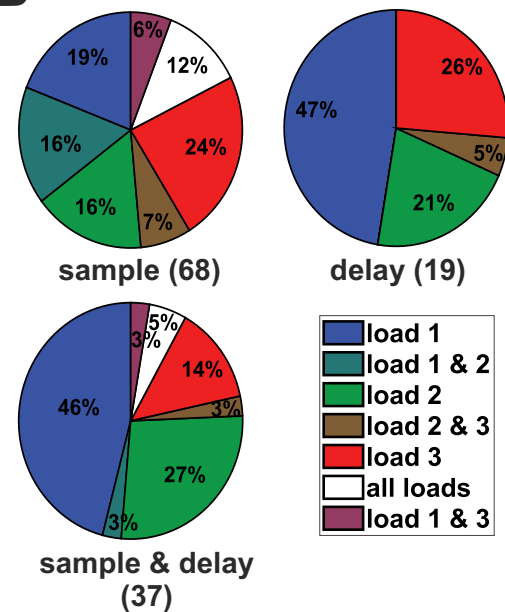**C**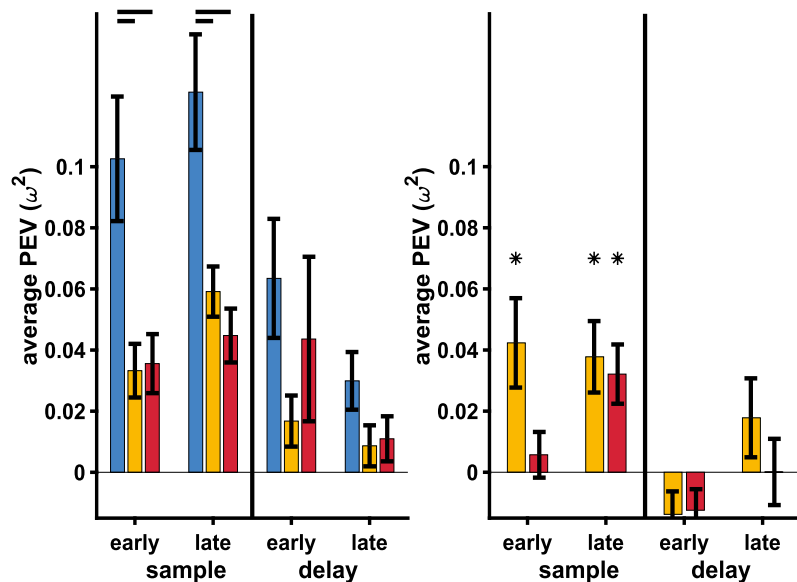**D**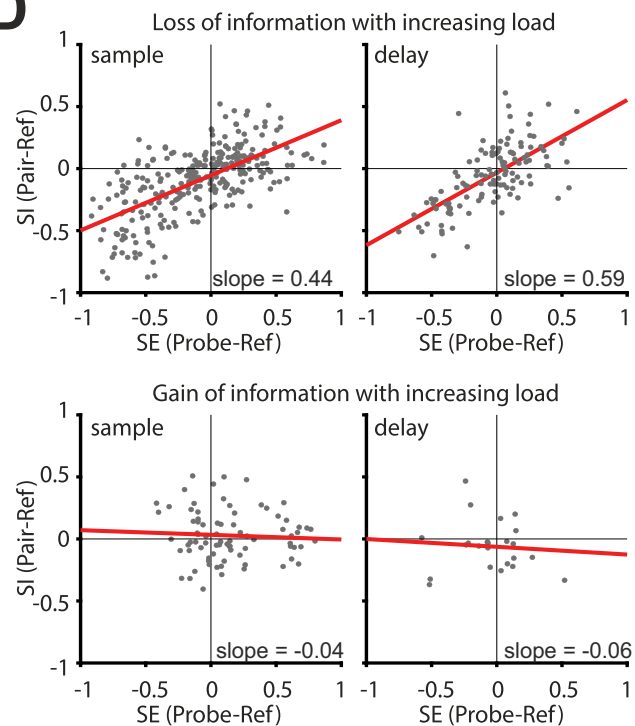

Supplement: supp [file elife-72783-supp-v1.zip]
